# Supplementary material
Source: Research Square preprint supplement (doi:10.21203/rs.3.rs-9247777/v1)
Supplement: Supplementary file 1 [file d7963c876735e3172a43311a.docx]

**Nature Portfolio Reporting Summary**

**Study design**

This manuscript reports a preclinical in vivo study in a diet-induced model of established atherosclerosis. Male LDLR−/− mice maintained on a cholesterol-containing Western-type diet were treated intravenously once daily for 10 consecutive days with vehicle or the dual-active hyaluronidase D016 (7,500 or 750,000 U kg⁻¹ day⁻¹), followed by a 19-day post-treatment observation period. The pre-specified primary endpoint was histological quantification of aortic-root lesion area at study day 29. Secondary outcomes included clinical condition, body-weight trajectories, and terminal serum biochemistry (hepatic and renal parameters).

**Experimental animals**

Species: mouse.

Strain/stock: low-density lipoprotein receptor–deficient (LDLR⁻/⁻; JAX 002207).

Sex: male.

Age: received at approximately 9–11 weeks of age; dosing commenced after an ~12-week Western-diet pretreatment period (approx. 21–23 weeks at first dose; the protocol notes that the exact age at dosing is recorded in the raw data).

Diet: cholesterol-containing Western-type diet (Research Diets D12079B) ad libitum for an ~12-week pretreatment period; the same diet continued throughout dosing and the subsequent post-treatment period.

Housing and husbandry: single housed in polycarbonate cages with appropriate bedding; environmental enrichment (nesting material) except during designated procedures; health status monitored at least twice daily with additional cage-side observations as warranted; body weight recorded three times per week.

**Experimental procedures**

Intervention: D016 (test article designation at the testing facility: Hyphilase Groningen / HyPGSP) or vehicle (Tris–HCl/NaCl buffer, pH 7.4). Dose formulations were stored at 4 °C until use and allowed to equilibrate to room temperature prior to administration.

Dosing: intravenous administration once daily for 10 consecutive days at 7,500 U kg⁻¹ day⁻¹ (low dose) or 750,000 U kg⁻¹ day⁻¹ (high dose); dose volume 5.0 mL kg⁻¹. Exploratory arms co-administered high-dose D016 with one of three protease-inhibitor systems (sys1–3; n=4 per arm).

Blood sampling: pre-dose blood was collected to measure total cholesterol and triglycerides for group allocation. Terminal blood was collected by intracardiac puncture into serum separator tubes, processed to serum (centrifugation 2,200 g, 10 min, room temperature) and stored at −20 °C until analysis.

Terminal procedures and tissue handling: animals were euthanised by carbon dioxide asphyxiation; perfused with phosphate-buffered saline followed by 10% neutral buffered formalin; the aorta (to the bifurcation) was collected in 10% neutral buffered formalin; the remaining heart with the attached ascending aorta segment was embedded in OCT and frozen for aortic-root sectioning.

Outcome assessment: aortic-root lesion area quantified on H&E-stained cryosections. Serial 10-µm sections were collected through the aortic sinus; images were acquired at predefined step levels spanning the sinus; total lesion area quantified by computer-assisted image analysis.

**Sample size**

Primary inferential groups: vehicle n=12; D016 low dose n=12; D016 high dose n=12.

Exploratory arms: D016 high dose + sys1 n=4; + sys2 n=4; + sys3 n=4.

Sample size determination (power calculation or a priori effect-size assumptions): group sizes were defined in the CRO protocol (n=12 per primary group; n=4 per exploratory arm). A formal a priori power calculation is not provided in the available study documentation.

**Replication**

Biological replicates: individual animals. Lesion-area quantification was based on serial sections through the aortic sinus per animal (technical replication). The manuscript reports a single predefined in vivo cohort; no additional independent in vivo replicate cohort is described.

**Randomisation**

Animals were allocated to treatment groups to minimise baseline differences, using body weight and pre-dose serum total cholesterol and triglycerides as allocation variables. Treatment initiation was staggered across cohorts to ensure balanced representation of groups across dosing days. The protocol describes covariate-based group allocation; a separate computer-generated random sequence is not described.

**Blinding**

Aortic-root lesion quantification was performed by Vascular Strategies LLC, an external analysis partner, using computer-assisted digital image analysis. Analysts were not involved in animal dosing or group allocation and were blinded to treatment allocation.

**Data exclusions**

No animals were excluded from the primary aortic-root lesion-area analysis, and no statistical outliers were removed. Per protocol, animals considered unsuitable prior to dosing could be replaced with spare animals before treatment initiation; this replacement process, if used, occurs before dosing and does not alter the analysed n in the primary endpoint dataset.

**Statistical methods**

All statistical tests were two-sided with a prespecified α=0.05. Aortic-root lesion areas in the primary groups were compared by one-way ANOVA followed by Dunnett’s multiple comparisons test (each active dose versus vehicle). Data are presented as mean ± SEM with individual animals shown. Exploratory protease-inhibitor arms were evaluated descriptively and are reported without over-interpretation given the small sample size. Statistical software: GraphPad Prism, version 10 (GraphPad Software, San Diego, CA). The manuscript does not report formal tests of ANOVA assumptions (e.g., normality or homoscedasticity).

**Data availability**

All data supporting the findings are available via Zenodo (DOI: 10.5281/zenodo.16785010). The repository includes raw aortic-root histology images, region-of-interest (ROI) masks, per-animal plaque-area measurements (CSV files), scripts reproducing the one-way ANOVA with Dunnett’s multiple comparisons test (CRL Study No. 20238304), and de-identified clinical summary tables. Source data for figures are provided.

**Code availability**

Analysis scripts used to reproduce the reported statistical analyses (one-way ANOVA with Dunnett’s multiple comparisons test; CRL Study No. 20238304) are available via Zenodo (DOI: 10.5281/zenodo.16785010). No additional custom code beyond these scripts was used.

**Ethics**

All animal procedures were approved by the Institutional Animal Care and Use Committee (IACUC) of Charles River Laboratories Massachusetts (CRMA IACUC; Study No. 20238304). Procedures were conducted in accordance with Directive 2010/63/EU, the U.S. Animal Welfare Act (9 CFR), the Public Health Service Policy, and the NIH Guide for the Care and Use of Laboratory Animals (8th edition). Humane endpoints were predefined. No unexpected mortality occurred. The study complied with ARRIVE guidelines.

**Human participants**

Not applicable for primary data generation in this manuscript (preclinical animal study). The Zenodo deposit additionally contains de-identified clinical summary tables provided for context; the manuscript does not report prospective human recruitment or intervention as part of a research protocol, and no identifiable personal data are included.

**Cell lines**

Not applicable.
